# Supplementary material
Source: Royal Society of Chemistry journal article supplement (doi:10.1039/d6cy00100a)
Supplement: d6cy00100a1.pdf [file d6cy00100a1.pdf]

# Supporting information

## Electrochemical Reconstruction Leading to Borate-linked

### **[Co(Fe)]<sub>8</sub>B<sub>2</sub>O<sub>16</sub>H<sub>2</sub> Crystalline Phase for Efficient and Stable OER**

Xing-Hui Zhang<sup>a</sup>, Yi-Fan Hu<sup>a</sup>, Zhi-Pan Liu<sup>\*ab</sup>

a. Collaborative Innovation Center of Chemistry for Energy Material, Shanghai Key Laboratory of Molecular Catalysis and Innovative Materials, Key Laboratory of Computational Physical Science, Department of Chemistry, Fudan University, Shanghai 200433, China. \*E-mail: zpliu@fudan.edu.cn

b. State Key Laboratory of Organometallic Chemistry, Shanghai Institute of Organic Chemistry, Chinese Academy of Sciences, Shanghai 200032, China

## Experimental

### Materials and Methods

Iron (III) Sulfate ( $\text{Fe}_2(\text{SO}_4)_3$ , 99%) was obtained from Adamas. Cobalt (II) acetate tetrahydrate ( $\text{Co}(\text{CH}_3\text{COO})_2 \cdot 4\text{H}_2\text{O}$ , 99.5%) was obtained from Macklin. Sodium borohydride ( $\text{NaBH}_4$ , 96%), Iron (III) nitrate nonahydrate ( $\text{Fe}(\text{NO}_3)_3 \cdot 9\text{H}_2\text{O}$ , 98.5%), Potassium hydroxide (KOH, 85%) were obtained from Sinopharm Chemical Reagent Co., Ltd. All the chemicals were used directly without further purification. All aqueous solutions were prepared using deionized (DI) water with a resistivity of 18.2 M $\Omega$  cm.

### Characterization

Powder X-ray diffraction (XRD) patterns were obtained on a Bruker D8 with Cu ( $K\alpha = 0.15406$  nm) as the X-ray source. High-resolution transmission electron microscopy (HR-TEM) data were obtained using an FEI Tecnai G2 F20 S-TWIN transmission electron microscope operating at 200 kV. Elemental mapping was performed on a JEOL-ARM 200F instrument equipped with a KeveX EDX detector (JED 2300T) operating at 200 kV. Fourier transform infrared (FT-IR) spectras were recorded in the range of 4000-1000  $\text{cm}^{-1}$  on a NICOLET iS50 FT-IR spectrometer. Raman wavenumber were recorded using the Horiba Jobin Yvon XploRA micro Raman system with a laser wavelength of 532 nm and a resolution of 4.6  $\text{cm}^{-1}$ . The Brunauer-Emmett-Teller (BET) surface area of the products were measured using nitrogen adsorption-desorption (TriStar II 3020). The actual contents of Co, Fe and B were determined by inductively coupled plasma-optical emission spectrometry (ICP-OES, Aglient 5110). All samples were digested with concentrated nitric acid before testing.

### Synthesis of catalysts

Synthesis of  $\text{Co}_x\text{Fe}_y\text{-B}$ : The synthesis methods mentioned above are similar, with the only difference being the addition of cobalt acetate and ferric nitrate in different feed ratios.

Synthesis of  $\text{Co}_4\text{Fe}$  and  $\text{Co-p}$ : The synthesis methods are similar to that mentioned above, with the only difference being the use of sodium hydroxide instead of sodium borohydride.

### Preparation of working electrode

The glassy carbon electrode was polished with  $\text{Al}_2\text{O}_3$  polishing powder before using, rinsed with deionized water and naturally dried. Then, 4.8 mg of catalyst was dispersed in a mixture consisting of 0.25 mL isopropanol, 0.75 mL deionized water and 0.05 mL Nafion (5% in a mixture of water and alcohol). The suspension was ultrasonicated for 1 h to form a homogeneous ink. After that, 5.24  $\mu\text{L}$  ink was dropped on the glassy carbon electrode and placed in the air to dry naturally.

### Electrochemical testing

All electrochemical tests were performed on a Princeton electrochemical workstation using a Hg/HgO as the reference electrode, platinum wire as the counter electrode, a rotating disk electrode with a rotation speed of 2000 rpm as the working electrode, and 1 M KOH as the electrolyte. This scan rate is slow enough to ensure steady-state behavior at the electrode surface, and the rotation rate is sufficiently fast to aid in product removal and limit bubble formation from evolved  $\text{O}_2$  at the electrode surface.

Before testing, cyclic voltammetry (CV) measurements were first conducted at a scan rate of 50 mV/s between 0.5-1.7 V vs. RHE. The linear sweep voltammetry (LSV) curves were collected at 5 mV/s between 0.5-1.7

V vs. RHE. The stability was tested at the fixing voltage corresponding to the current density of 10 mA/cm<sup>2</sup>. Electrochemical impedance spectroscopy was conducted at 1.51 V vs. RHE from 10000 Hz to 0.01 Hz with an amplitude of 5 mV. The series resistance (R<sub>s</sub>) values were determined using electrochemical impedance (EIS) measurement data and later used for ohmic drop compensation. CV was performed in the non-Faradaic region at scan rates of 5, 10, 15, 20 and 25 mV/s, and the third cycle value was taken to calculate ECSA.

Based on Tafel analysis for multi-electron transfer reactions, the Tafel slope can be calculated as the following<sup>1</sup>:

$$b = \frac{\alpha\eta}{\alpha \log i_{=}} \frac{2.303RT}{\alpha F}$$

$$\alpha = \frac{nb}{v + n_r\beta}$$

where  $n_b$  is the number of electrons transferred before the PDS,  $n_r$  is the number of electrons transferred during the PDS,  $v$  is the number of PDS repeated during the reaction.

To quantify the double-layer capacitance, cyclic voltammetry (CV) was performed within a potential range where no significant Faradaic processes occur. This range was identified from static CV measurements and typically corresponds to a 0.1 V potential window centered at the open-circuit potential (OCP) of the system. Within this non-Faradaic region, all measured current is assumed to originate from double-layer charging. The charging current was then obtained from CVs conducted at multiple scan rates.

#### **In Situ Surface Enhanced Raman Spectroscopy.**

Raman experiments were performed in a single-compartment, custom-made electrochemical Teflon cell at room temperature. The wavelength of the excitation light source was 532 nm, with a laser power of ~100% with the grading of 2400/mm. Thirty consecutive scans, with 1 s exposure time per scan, produced each spectrum with a resolution of 1.3 cm<sup>-1</sup>. To ensure high confidence and reproducibility in the quality of the obtained spectra, we calibrated the energy shift using the 520.7 cm<sup>-1</sup> peak of silicon. We first electrically deposited a layer of gold on the working electrode to obtain the surface-enhanced effect. Using a glassy carbon electrode as the working electrode, silver chloride as the reference electrode, and platinum wire as the counter electrode, electrodeposition was carried out at a -0.5 V vs Ag/AgCl in 5 mg/mL HAuCl<sub>4</sub>+0.1 M NaClO<sub>4</sub> electrolyte for 400 seconds. The Raman signals were recorded in situ at OCP and under different applied potentials spanning from 0.5-1.7 V vs. RHE in 1 M KOH.

#### **Determination of Faraday efficiency**

The Faradaic efficiency of O<sub>2</sub> production by each catalyst was measured using a RRDE apparatus. The collection efficiency N of the rotating ring-disk electrode assembly was independently determined to be N = 38% from reducing K<sub>3</sub>Fe(CN)<sub>6</sub> at a GC electrode and reoxidizing it at the Pt ring. RRDE measurements were conducted in a cell purged for ~30 min with Ar and then blanketed with Ar during the experiment. Before any ring currents were collected, the Pt ring was polished by hand with 1 μm MetaDi Supreme diamond slurry (Buehler) first on a Nylon polishing cloth (Buehler) and then on a Microcloth polishing pad (Buehler), followed by rinsing in pure water. The disk electrode was then held at open circuit for 500 s, and the ring electrode was held at 0.4 V vs RHE in Ar-saturated 1 M KOH. This was to establish the background current at the ring electrode. The magnitude of the background currents was typically  $|i_{ring}| < 3 \mu A$ . The disk electrode was then held at 0.5, 1, 2, 5, and 10 mA/cm<sup>2</sup> at 2000 rpm for 500 s in 1 M KOH, while the ring was held constant at 0.4 V vs RHE.

In this setup, the disk electrode generates oxygen at a constant rotation speed of 2000 rpm under a current density ranging from 0.1 to 10 mA/cm<sup>2</sup>, while the surrounding Pt ring electrode, held at a constant potential of 0.4 V vs. RHE, rapidly reduces O<sub>2</sub> to H<sub>2</sub>O<sub>2</sub>. Representative disk and ring currents for Co<sub>4</sub>Fe-B are shown in Fig. S7a. The Faradaic efficiency was calculated based on the ring current collected during the measurements while the disk electrode was maintained at a constant current density of 1 mA/cm<sup>2</sup> per geometric area. This current density was chosen to ensure significant O<sub>2</sub> production while minimizing local saturation and bubble formation at the disk electrode. The Faradaic efficiency is directly proportional to the ratio of the ring current to the disk current and can be calculated using the following equation:

$$FE = \frac{2i_r}{idN}$$

where  $i_r$  is the measured ring current,  $i_d$  is the disk current, and  $N=0.38$  represents the collection efficiency of the RRDE.

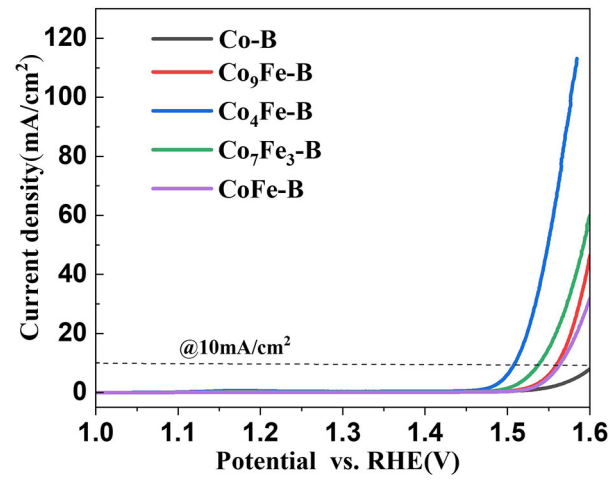

**Figure S1.** LSV curves (a) of catalysts with different molar ratio of Co:Fe. (b) Cyclic voltammograms of Co<sub>4</sub>Fe-B at different scan rates (5-25 mV/s).

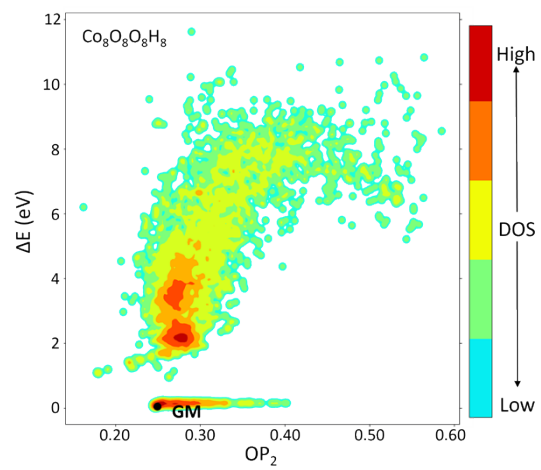

**Figure S2.** Global PES of CoOOH.

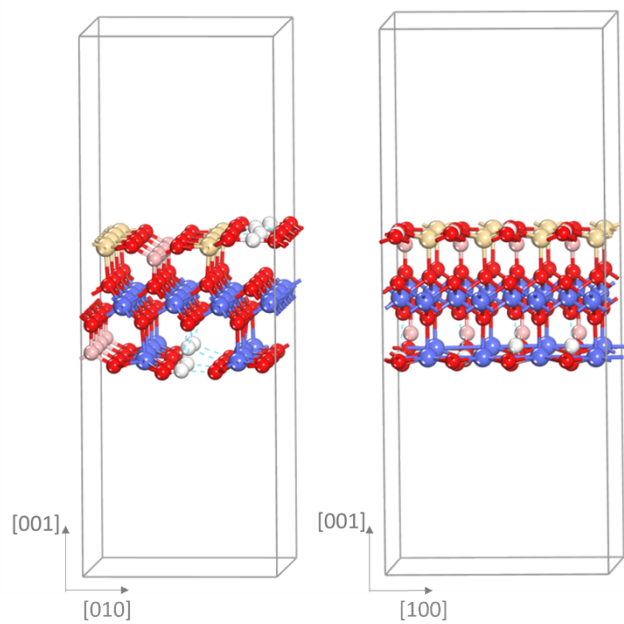

**Figure S3.** Fe-adopted  $\text{Co}_8\text{B}_2\text{O}_{16}\text{H}_2$  [110] slab model. Light orange: Fe; blue: Co; red: O; pink: B; white: H.

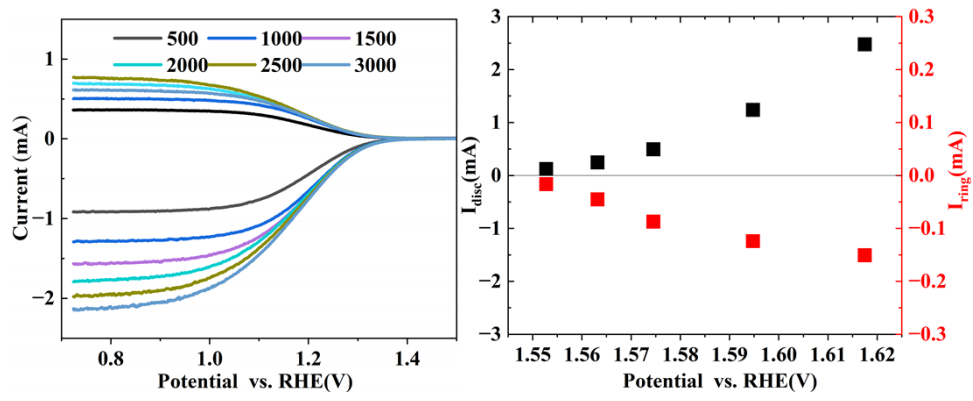

**Figure S4.** (a) Determination of the ring collection efficiency at different rotation rates. (b) Rotating ring-disc electrode (RRDE) measurement of  $Co_4Fe-B$  in 1 M KOH.

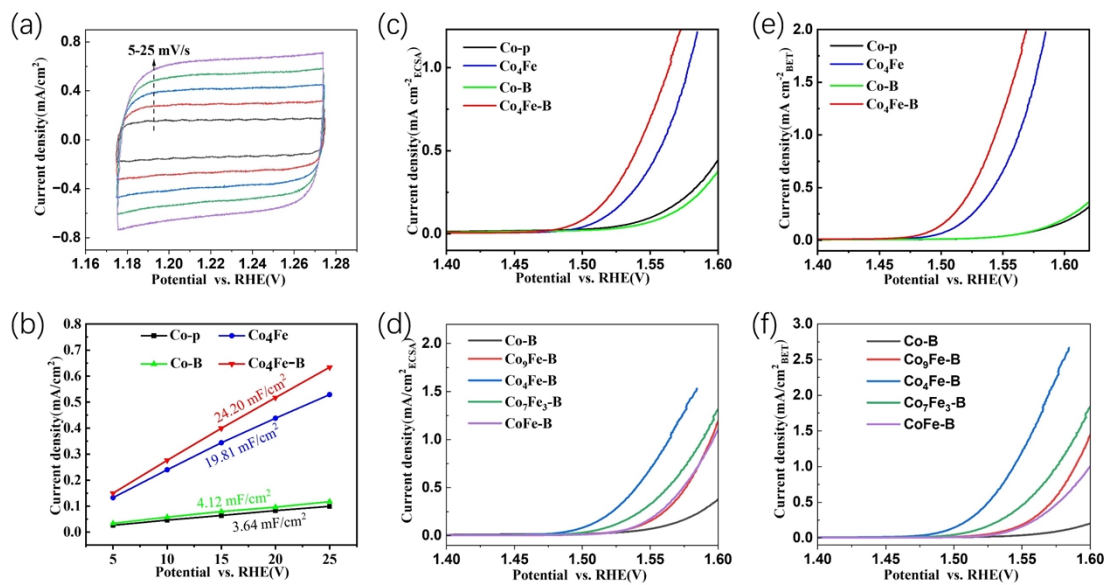

**Figure S5.** (a) Cyclic voltammograms of Co<sub>4</sub>Fe-B at different scan rates (5-25 mV/s). (b) The Corresponding C<sub>dl</sub> values of Co<sub>x</sub>Fe<sub>y</sub>-B. Stabilized LSV curves of Co<sub>x</sub>Fe<sub>y</sub>-B samples normalized to their (c), (d) ECSA and (e), (f) BET surface areas.

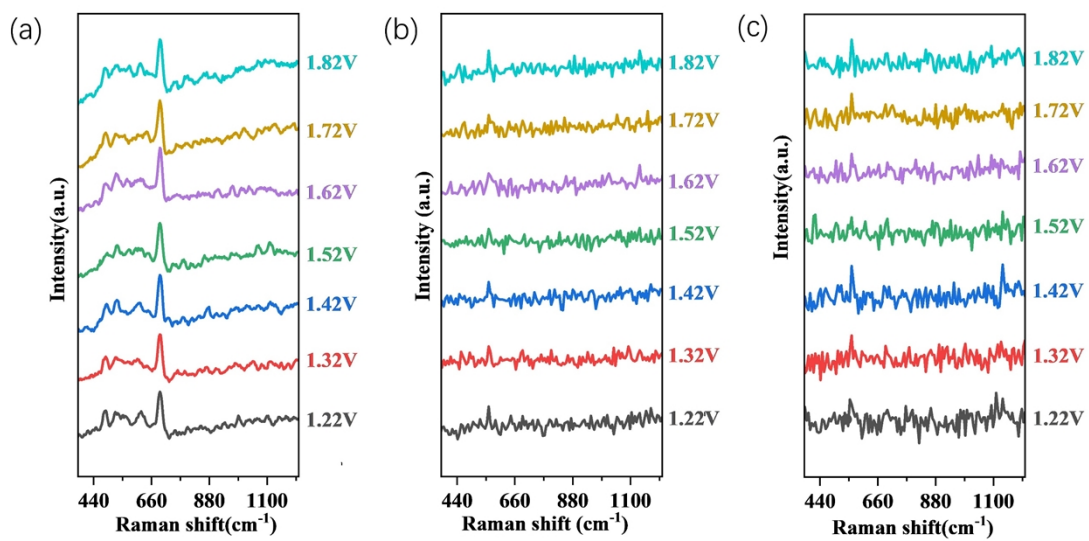

**Figure S6.** In-situ Raman spectra of (a) Co-B, (b) Co<sub>4</sub>Fe and (c) Co-p collected in 0.1 M KOH electrolyte during the multi-potential steps.

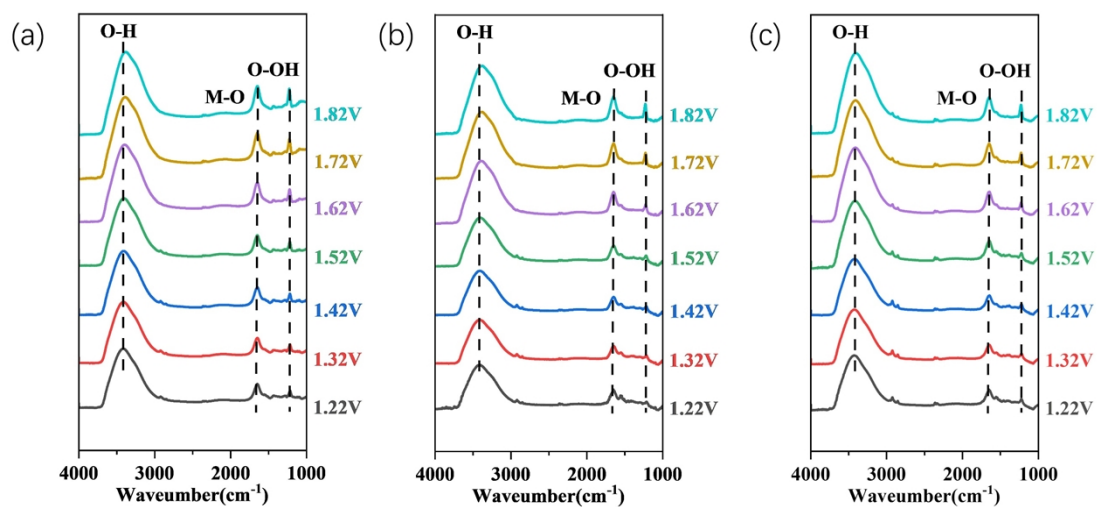

**Figure S7.** In-situ FT-IR spectra of (a) Co-B, (b) Co<sub>4</sub>Fe and (c) Co-p collected in 0.1 M KOH electrolyte during the multi-potential steps.

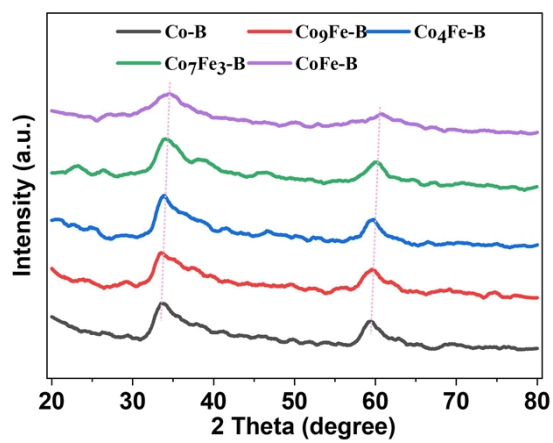

Figure S8. XRD patterns of Co<sub>x</sub>Fe<sub>y</sub>-B catalysts.

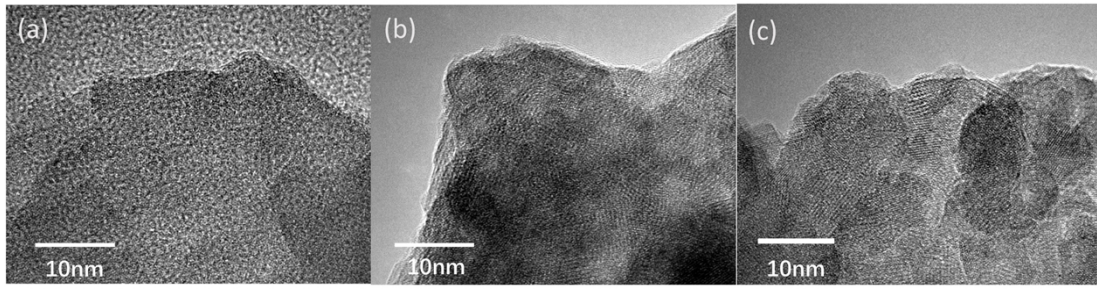

**Figure S9.** High-resolution TEM images of (a) Co-B, (b) Co<sub>4</sub>Fe and (c) Co-p.

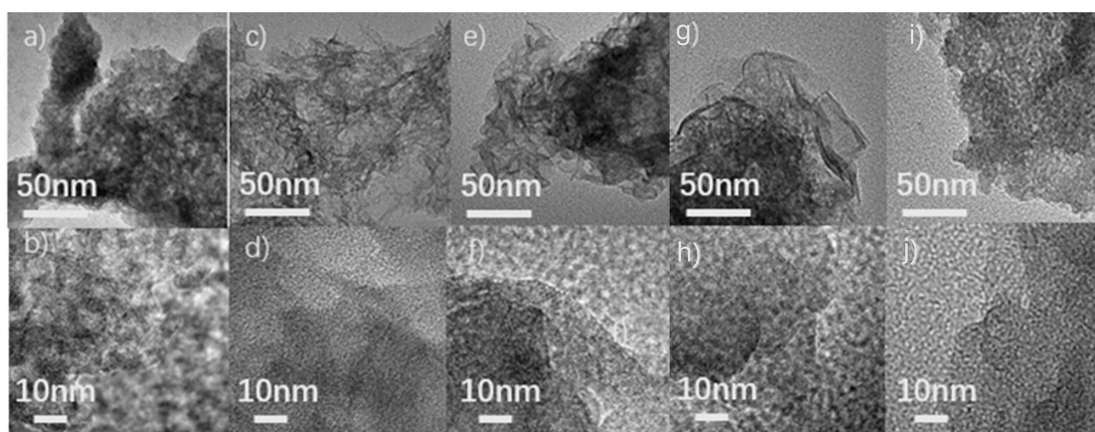

**Figure S10.** High-resolution TEM images of (a) (b)Co-B, (c) (d) Co<sub>9</sub>Fe-B, (e) (f) Co<sub>4</sub>Fe-B, (g) (h) Co<sub>7</sub>Fe<sub>3</sub>-B, (i) (j), CoFe-B.

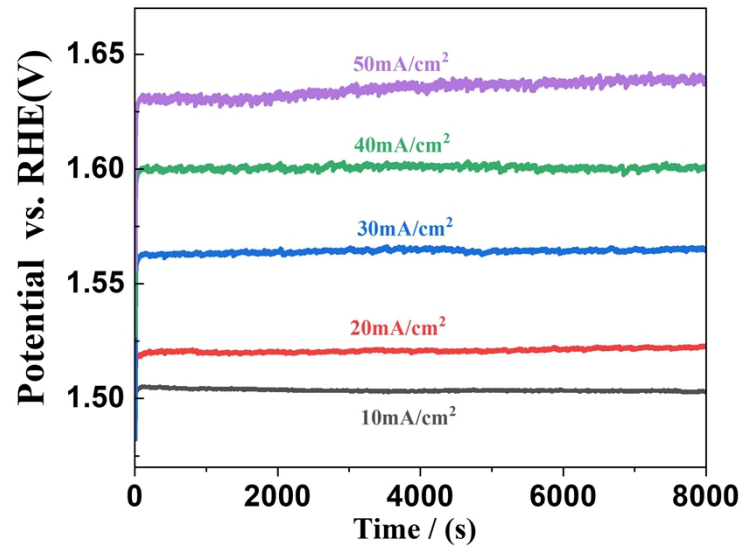

Figure S11. Stability test of Co<sub>4</sub>Fe-B catalyst at different current densities.

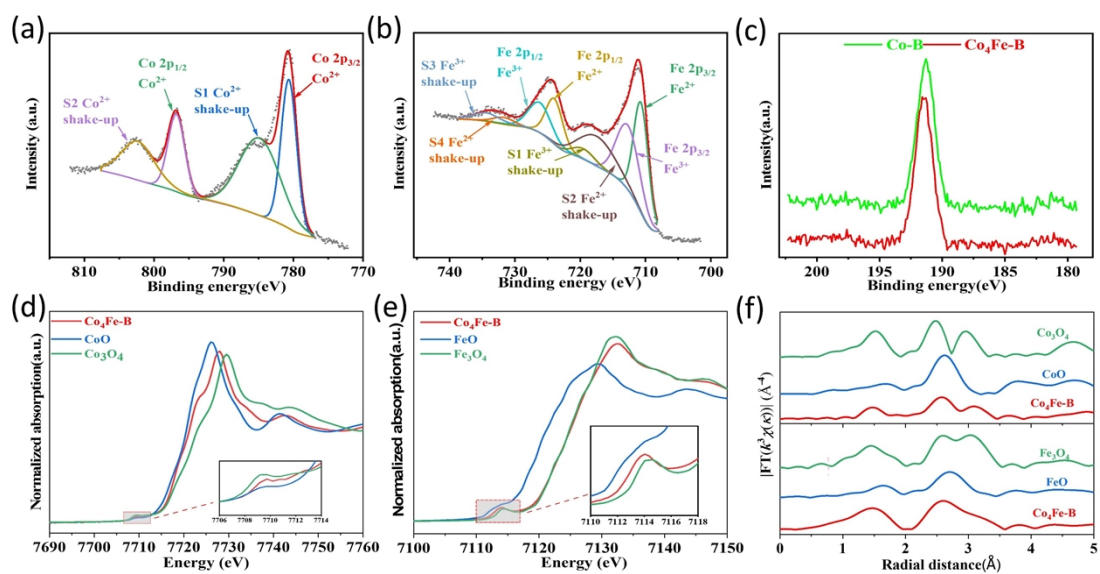

**Figure S12.** XPS spectra of (a,) Co 2p, (b) Fe 2p and (c) B 1s of Co<sub>4</sub>Fe-B. Co (d) and Fe (e) K-edge XANES spectra of Co<sub>4</sub>Fe-B. (f) EXAFS spectra of Co<sub>4</sub>Fe-B including CoO, Co<sub>3</sub>O<sub>4</sub>, FeO and Fe<sub>3</sub>O<sub>4</sub> as references.

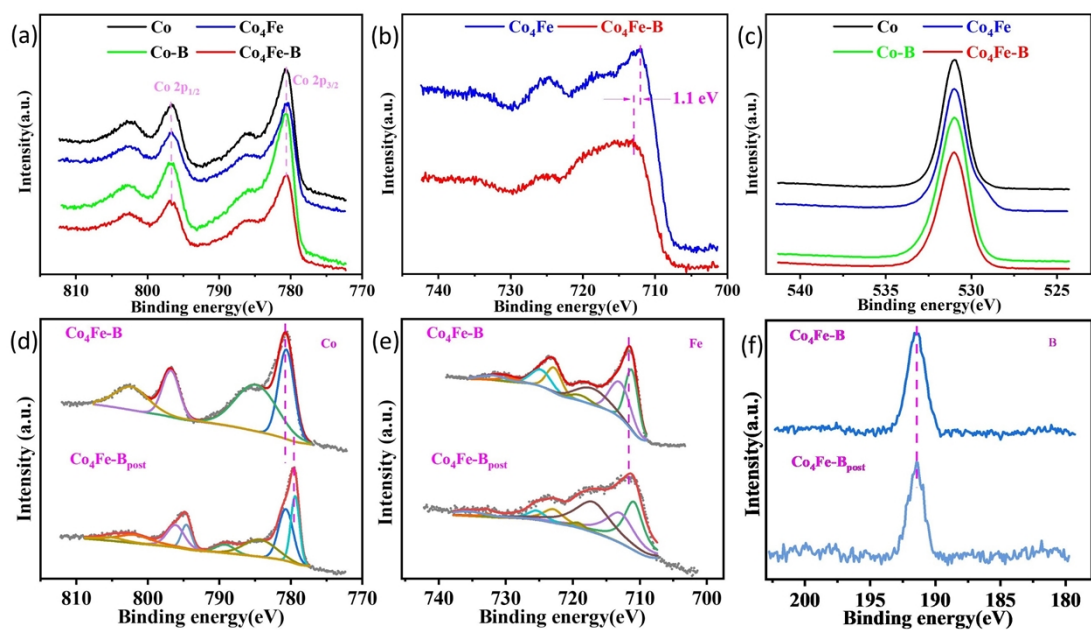

**Figure S13.** XPS spectra of (a) Co 2p, (b) Fe 2p and (c) O 1s of Co<sub>4</sub>Fe-B. XPS spectra of (d) Co 2p, (e) Fe 2p and (f) B 1s of Co<sub>4</sub>Fe-B after long-term stability testing.

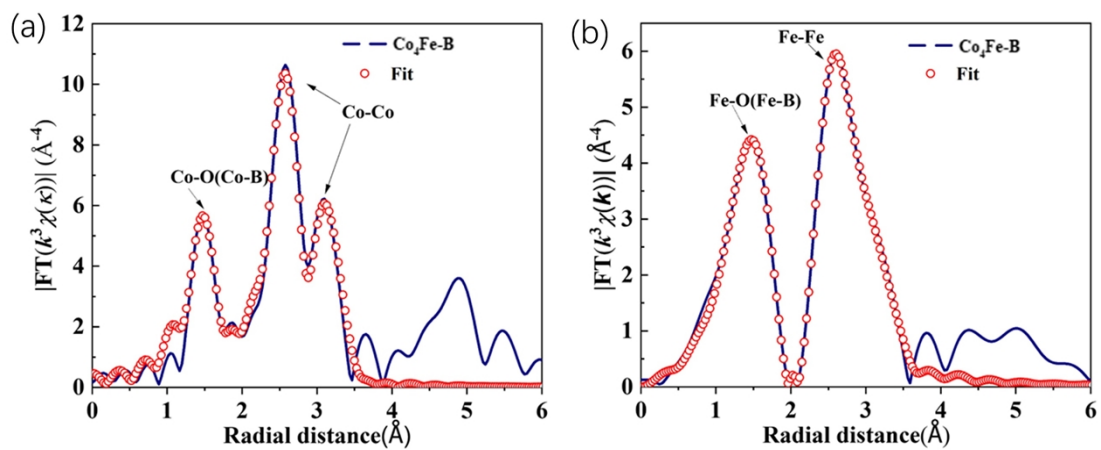

Figure S14. Co K-edge (a) EXAFS spectra of  $\text{Co}_4\text{Fe-B}$  including Co foil, CoO,  $\text{Co}_3\text{O}_4$  and  $\text{Co}(\text{OH})_2$  as references. (c)

Fe K-edge EXAFS spectra of  $\text{Co}_4\text{Fe-B}$  including Fe foil, FeO and  $\text{Fe}_3\text{O}_4$  as references.

**Table S1.** Selected Co-based catalyst towards the oxygen evolution reaction.

| Catalyst                                        | Electrolyte | $\eta@10\text{mA}/\text{cm}^2(\text{mV})$ | Tafel Slope(mV/dec) | Refs. |
|-------------------------------------------------|-------------|-------------------------------------------|---------------------|-------|
| $\text{Co}_3\text{O}_4$                         | 1 M KOH     | 359                                       | 82                  | 3     |
| m-P/ $\text{Co}_3\text{O}_4$                    | 1 M KOH     | 314                                       | 66                  | 3     |
| h-P/ $\text{Co}_3\text{O}_4$                    | 1 M KOH     | 334                                       | 74                  | 3     |
| $\text{Co}_3\text{O}_4/\text{CoFe oxide DSNBs}$ | 1 M KOH     | 297                                       | 61                  | 4     |
| Co/NGC-3                                        | 1 M KOH     | 396                                       | 92                  | 5     |
| CoO/ $\text{Co}_4\text{N}$                      | 1 M KOH     | 398                                       | 83                  | 6     |
| N-NiCoP <sub>x</sub> /NCF                       | 1 M KOH     | 298                                       | 60                  | 7     |
| CoSe <sub>2</sub>                               | 1 M KOH     | 325                                       | 80                  | 8     |
| CoS <sub>2</sub> /G                             | 1 M KOH     | 300                                       | 56                  | 9     |
| CoO <sub>x</sub> NPs/BNG                        | 1 M KOH     | 295                                       | 57                  | 10    |
| Fe-CoOOH/G                                      | 1 M KOH     | 330                                       | 37                  | 11    |
| Co <sub>2</sub> P                               | 1 M KOH     | 364                                       |                     | 12    |
| Co(OH) <sub>2</sub> @NCNTs@NF                   | 1 M KOH     | 270                                       | 72                  | 13    |
| FeCo <sub>3</sub> N                             | 1 M KOH     | 294                                       | 49                  | 14    |
| CoFe(OH) <sub>x</sub>                           | 1 M KOH     | 294                                       | 63                  | 15    |
| CoFe alloy/N                                    | 1 M KOH     | 340                                       | 78                  | 16    |
| CoFe PBA                                        | 1 M KOH     | 305                                       | 36                  | 17    |
| CoB                                             | 1 M KOH     | 355                                       | 49                  | 18    |
| CoB/g-C <sub>3</sub> N <sub>4</sub>             | 1 M KOH     | 360                                       | 94                  | 19    |
| CoB                                             | 1 M KOH     | 290                                       | 62                  | 20    |
| r-B-CoFe <sub>2</sub> O <sub>4</sub>            | 1 M KOH     | 240                                       | 32                  | 21    |

**Table S2.** Structural information of the global PES dataset for G-NN potential training

| Species  | $N_{\text{atm}}$ | cluster | layer | bulk | total | Species       | $N_{\text{atm}}$ | cluster | layer | bulk | total |
|----------|------------------|---------|-------|------|-------|---------------|------------------|---------|-------|------|-------|
|          |                  | r       | r     |      |       |               |                  | r       | r     |      |       |
| Co15     | 15               | 0       | 90    | 1    | 91    | H6-Co25       | 31               | 0       | 56    | 0    | 56    |
| Co27     | 27               | 0       | 52    | 0    | 52    | H6-Co26       | 32               | 0       | 0     | 62   | 62    |
| Co28     | 28               | 0       | 43    | 1    | 44    | H6-O1-Co24    | 31               | 0       | 144   | 0    | 144   |
| Co29     | 29               | 0       | 10    | 0    | 10    | H6-O11-Co8    | 25               | 0       | 129   | 328  | 457   |
| O1       | 1                | 2       | 1     | 0    | 3     | H6-O12-Co6    | 24               | 0       | 23    | 164  | 187   |
| O1-Co16  | 17               | 0       | 12    | 0    | 12    | H6-O15-Co8    | 29               | 0       | 35    | 0    | 35    |
| O2-Co16  | 18               | 0       | 0     | 17   | 17    | H6-O16-Co9    | 31               | 0       | 17    | 0    | 17    |
| O2-Co31  | 33               | 0       | 69    | 0    | 69    | H6-O21-Co14   | 41               | 0       | 2     | 0    | 2     |
| O2-Co32  | 34               | 0       | 25    | 0    | 25    | H6-B1-O10-Co8 | 25               | 0       | 22    | 125  | 147   |
| O4       | 4                | 0       | 15    | 0    | 15    | H6-B1-O11-Co7 | 25               | 0       | 6     | 92   | 98    |
| O5-Co30  | 35               | 0       | 64    | 0    | 64    | H6-B1-O14-Co8 | 29               | 0       | 10    | 47   | 57    |
| O5-Co31  | 36               | 0       | 31    | 0    | 31    | H6-B2-O9-Co8  | 25               | 0       | 8     | 53   | 61    |
| O6-Co8   | 14               | 0       | 2     | 26   | 28    | H6-B2-O11-Co6 | 25               | 0       | 8     | 15   | 23    |
| O7-Co8   | 15               | 0       | 9     | 99   | 108   | H6-B2-O13-Co8 | 29               | 0       | 2     | 18   | 20    |
| O8-Co6   | 14               | 238     | 0     | 0    | 238   | H6-B2-O15-Co6 | 29               | 0       | 10    | 25   | 35    |
| O8-Co8   | 16               | 265     | 7     | 274  | 301   | H6-B3-O8-Co8  | 25               | 0       | 5     | 28   | 33    |
| O10-Co8  | 18               | 0       | 18    | 619  | 637   | H6-B3-O12-Co8 | 29               | 0       | 7     | 16   | 23    |
| O11      | 11               | 0       | 78    | 24   | 102   | H6-B4-O1-Co20 | 31               | 0       | 4     | 11   | 15    |
| O11-Co12 | 23               | 0       | 0     | 1    | 1     | H6-B4-O7-Co8  | 25               | 0       | 3     | 20   | 23    |
| O11-Co16 | 27               | 0       | 0     | 3    | 3     | H6-B6-O5-Co8  | 25               | 0       | 8     | 16   | 24    |
| O12-Co8  | 20               | 53      | 16    | 232  | 239   | H7-Co27       | 34               | 0       | 1     | 34   | 35    |
| O12-Co12 | 24               | 0       | 0     | 3    | 3     | H7-O15-Co8    | 30               | 0       | 130   | 329  | 459   |
| O13-Co12 | 25               | 0       | 0     | 5    | 5     | H7-O16-Co8    | 31               | 0       | 47    | 1    | 48    |
| O14-Co12 | 26               | 0       | 0     | 14   | 14    | H7-O17-Co16   | 40               | 0       | 23    | 0    | 23    |
| O15-Co12 | 27               | 0       | 0     | 5    | 5     | H7-B1-O14-Co8 | 30               | 0       | 3     | 41   | 44    |

|             |    |   |     |     |     |                |    |   |     |     |      |
|-------------|----|---|-----|-----|-----|----------------|----|---|-----|-----|------|
| O15-Co16    | 31 | 0 | 0   | 6   | 6   | H7-B1-O15-Co7  | 30 | 0 | 2   | 65  | 67   |
| O16-Co8     | 24 | 0 | 216 | 139 | 355 | H7-B2-O13-Co8  | 30 | 0 | 14  | 54  | 68   |
| O16-Co12    | 28 | 0 | 0   | 518 | 518 | H7-B2-O14-Co8  | 31 | 0 | 12  | 54  | 66   |
| O17-Co12    | 29 | 0 | 1   | 0   | 1   | H7-B2-O15-Co6  | 30 | 0 | 14  | 31  | 45   |
| O18-Co11    | 29 | 0 | 1   | 0   | 1   | H7-B3-O12-Co8  | 30 | 0 | 11  | 73  | 84   |
| O18-Co12    | 30 | 0 | 0   | 45  | 45  | H7-B3-O15-Co5  | 30 | 0 | 4   | 4   | 8    |
| O20-Co16    | 36 | 0 | 0   | 11  | 11  | H7-B4-O11-Co8  | 30 | 0 | 12  | 119 | 131  |
| O22-Co20    | 42 | 0 | 0   | 11  | 11  | H7-B5-O10-Co8  | 30 | 0 | 9   | 46  | 55   |
| O23-Co20    | 43 | 0 | 0   | 6   | 6   | H8-O8-Co4      | 20 | 0 | 360 | 310 | 670  |
| O24-Co20    | 44 | 0 | 0   | 2   | 2   | H8-O14-Co8     | 30 | 0 | 27  | 0   | 27   |
| O26-Co20    | 46 | 0 | 0   | 9   | 9   | H8-O15-Co8     | 31 | 0 | 27  | 0   | 27   |
| B1-O3-Co1   | 5  | 1 | 0   | 0   | 1   | H8-O16-Co8     | 32 | 0 | 186 | 924 | 1110 |
| B2-O6-Co2   | 10 | 0 | 0   | 1   | 1   | H8-O17-Co15    | 40 | 0 | 3   | 0   | 3    |
| B2-O10-Co6  | 18 | 0 | 0   | 8   | 8   | H8-O23-Co14    | 45 | 0 | 2   | 0   | 2    |
| B4-O8-Co2   | 14 | 0 | 4   | 6   | 10  | H8-O23-Co15    | 46 | 0 | 19  | 0   | 19   |
| B4-O10-Co4  | 18 | 0 | 7   | 10  | 17  | H8-O23-Co16    | 47 | 0 | 4   | 2   | 6    |
| B4-O12-Co4  | 20 | 0 | 42  | 156 | 198 | H8-O24-Co16    | 48 | 0 | 0   | 3   | 3    |
| B4-O12-Co6  | 22 | 0 | 21  | 225 | 246 | H8-B1-O14-Co7  | 30 | 0 | 14  | 40  | 54   |
| B4-O16-Co8  | 28 | 0 | 19  | 196 | 215 | H8-B1-O16-Co7  | 32 | 0 | 67  | 532 | 599  |
| B4-O20-Co12 | 36 | 0 | 7   | 259 | 266 | H8-B2-O14-Co8  | 32 | 0 | 7   | 115 | 122  |
| B4-O24-Co12 | 40 | 0 | 6   | 75  | 81  | H8-B2-O16-Co6  | 32 | 0 | 7   | 12  | 19   |
| B6-O18-Co6  | 30 | 0 | 8   | 54  | 62  | H8-B4-O48-Co28 | 88 | 0 | 63  | 86  | 149  |

|              |    |   |     |     |     |                 |    |   |     |     |     |
|--------------|----|---|-----|-----|-----|-----------------|----|---|-----|-----|-----|
| B8-Co16      | 24 | 0 | 0   | 5   | 5   | H8-B8-O32-Co32  | 80 | 0 | 0   | 11  | 11  |
| B8-O16-Co4   | 28 | 0 | 27  | 387 | 414 | H8-B8-O40-Co32  | 88 | 0 | 2   | 34  | 36  |
| B8-O20-Co8   | 36 | 0 | 2   | 309 | 311 | H8-B12-O36-Co32 | 88 | 0 | 1   | 15  | 16  |
| B8-O24-Co8   | 40 | 0 | 172 | 392 | 564 | H8-B24-O48-Co2  | 82 | 0 | 93  | 37  | 130 |
| B8-O32-Co16  | 56 | 0 | 0   | 2   | 2   | H9-O19-Co8      | 36 | 0 | 140 | 243 | 383 |
| B10-Co14     | 24 | 0 | 0   | 2   | 2   | H9-B1-O18-Co8   | 36 | 0 | 7   | 26  | 33  |
| B12-Co12     | 24 | 0 | 0   | 2   | 2   | H9-B1-O19-Co7   | 36 | 0 | 1   | 0   | 1   |
| B12-O12-Co2  | 26 | 0 | 50  | 104 | 154 | H9-B2-O17-Co8   | 36 | 0 | 8   | 30  | 38  |
| B12-O26-Co8  | 46 | 1 | 10  | 217 | 228 | H9-B4-O15-Co8   | 36 | 0 | 19  | 125 | 144 |
| B12-O36-Co10 | 58 | 0 | 0   | 1   | 1   | H9-B5-O14-Co8   | 36 | 0 | 8   | 28  | 36  |
| B16-Co8      | 24 | 0 | 4   | 11  | 15  | H9-B6-O13-Co8   | 36 | 0 | 5   | 14  | 19  |
| B16-O28-Co4  | 48 | 0 | 45  | 321 | 366 | H10-O15-Co8     | 33 | 0 | 250 | 575 | 825 |
| B16-O32-Co8  | 56 | 0 | 8   | 53  | 61  | H10-B1-O14-Co8  | 33 | 0 | 9   | 217 | 226 |
| B20-Co4      | 24 | 0 | 18  | 118 | 136 | H10-B1-O15-Co7  | 33 | 0 | 1   | 8   | 9   |
| B21-Co3      | 24 | 0 | 5   | 40  | 45  | H10-B2-O13-Co8  | 33 | 0 | 47  | 155 | 202 |
| B32-O56-Co8  | 96 | 0 | 3   | 188 | 191 | H10-B2-O15-Co6  | 33 | 0 | 11  | 65  | 76  |
| B64-Co32     | 96 | 0 | 2   | 0   | 2   | H10-B3-O12-Co8  | 33 | 0 | 1   | 31  | 32  |
| B80-Co16     | 96 | 0 | 28  | 68  | 96  | H10-B3-O15-Co5  | 33 | 0 | 20  | 17  | 37  |
| B84-Co12     | 96 | 0 | 8   | 4   | 12  | H10-B4-O11-Co8  | 33 | 0 | 16  | 28  | 44  |
| H1           | 1  | 0 | 1   | 0   | 1   | H10-B5-O10-Co8  | 33 | 0 | 36  | 69  | 105 |
| H1-Co16      | 17 | 0 | 134 | 1   | 135 | H10-B7-O8-Co8   | 33 | 0 | 2   | 1   | 3   |
| H1-Co26      | 27 | 0 | 41  | 0   | 41  | H12-O17-Co8     | 37 | 0 | 197 | 445 | 642 |

|               |    |   |     |     |     |                  |     |   |     |      |      |
|---------------|----|---|-----|-----|-----|------------------|-----|---|-----|------|------|
| H1-O1         | 2  | 0 | 3   | 0   | 3   | H12-O18-Co8      | 38  | 0 | 39  | 0    | 39   |
| H1-O1-Co15    | 17 | 0 | 21  | 0   | 21  | H12-O22-Co16     | 50  | 0 | 0   | 10   | 10   |
| H1-O2-Co30    | 33 | 0 | 55  | 0   | 55  | H12-B1-O15-Co8   | 36  | 0 | 12  | 335  | 347  |
| H1-O5-Co29    | 35 | 0 | 52  | 0   | 52  | H12-B1-O16-Co8   | 37  | 0 | 35  | 259  | 294  |
| H1-O6-Co31    | 38 | 0 | 49  | 0   | 49  | H12-B1-O17-Co7   | 37  | 0 | 17  | 179  | 196  |
| H1-O7-Co31    | 39 | 0 | 60  | 0   | 60  | H12-B2-O15-Co8   | 37  | 0 | 18  | 130  | 148  |
| H1-O7-Co32    | 40 | 0 | 19  | 0   | 19  | H12-B2-O16-Co8   | 38  | 0 | 23  | 43   | 66   |
| H1-O11-Co8    | 20 | 0 | 2   | 96  | 98  | H12-B3-O14-Co8   | 37  | 0 | 51  | 145  | 196  |
| H1-O14-Co15   | 30 | 0 | 6   | 2   | 8   | H12-B3-O15-Co8   | 38  | 0 | 20  | 28   | 48   |
| H1-O19-Co16   | 36 | 0 | 4   | 8   | 12  | H12-B3-O17-Co5   | 37  | 0 | 0   | 1    | 1    |
| H1-B1-O10-Co8 | 20 | 0 | 0   | 5   | 5   | H12-B4-O13-Co8   | 37  | 0 | 28  | 142  | 170  |
| H1-B1-O11-Co7 | 20 | 0 | 0   | 3   | 3   | H12-B5-O12-Co8   | 37  | 0 | 10  | 38   | 48   |
| H1-B2-O11-Co6 | 20 | 0 | 0   | 1   | 1   | H12-B48-O92-Co14 | 166 | 0 | 0   | 106  | 106  |
| H2            | 2  | 4 | 0   | 0   | 4   | H13-Co19         | 32  | 0 | 0   | 1    | 1    |
| H2-Co15       | 17 | 0 | 115 | 0   | 115 | H13-B1-O16-Co8   | 38  | 0 | 115 | 1630 | 1745 |
| H2-Co19       | 21 | 0 | 47  | 68  | 115 | H13-B2-O14-Co8   | 37  | 0 | 6   | 59   | 65   |
| H2-Co20       | 22 | 0 | 0   | 28  | 28  | H14-Co20         | 34  | 0 | 2   | 45   | 47   |
| H2-O2-Co1     | 5  | 0 | 0   | 6   | 6   | H14-O7           | 21  | 0 | 1   | 759  | 760  |
| H2-O2-Co16    | 20 | 0 | 0   | 20  | 20  | H14-O13-Co4      | 31  | 0 | 11  | 12   | 23   |
| H2-O2-Co29    | 33 | 0 | 66  | 0   | 66  | H14-O16-Co8      | 38  | 0 | 96  | 239  | 335  |
| H2-O2-Co30    | 34 | 0 | 17  | 0   | 17  | H14-O17-Co8      | 39  | 0 | 80  | 229  | 309  |
| H2-O3-Co28    | 33 | 0 | 44  | 0   | 44  | H14-O19-Co8      | 41  | 0 | 130 | 240  | 370  |
| H2-O4-Co2     | 8  | 0 | 0   | 6   | 6   | H14-O30-Co16     | 60  | 0 | 0   | 8    | 8    |
| H2-O10-       | 20 | 0 | 5   | 131 | 136 | H14-B1-O15-      | 38  | 0 | 17  | 117  | 134  |

|                |    |   |    |     |     |                |    |   |     |      |      |
|----------------|----|---|----|-----|-----|----------------|----|---|-----|------|------|
| Co8            |    |   |    |     |     | Co8            |    |   |     |      |      |
| H2-O11-Co8     | 21 | 0 | 7  | 277 | 284 | H14-B1-O16-Co7 | 38 | 0 | 0   | 13   | 13   |
| H2-O12-Co8     | 22 | 0 | 7  | 359 | 366 | H14-B1-O16-Co8 | 39 | 0 | 7   | 79   | 86   |
| H2-O14-Co14    | 30 | 0 | 6  | 0   | 6   | H14-B1-O17-Co7 | 39 | 0 | 4   | 28   | 32   |
| H2-O18-Co11    | 31 | 0 | 2  | 0   | 2   | H14-B1-O18-Co8 | 41 | 0 | 8   | 133  | 141  |
| H2-O18-Co12    | 32 | 0 | 4  | 0   | 4   | H14-B1-O19-Co7 | 41 | 0 | 3   | 6    | 9    |
| H2-O22-Co16    | 40 | 0 | 6  | 3   | 9   | H14-B2-O14-Co8 | 38 | 0 | 2   | 10   | 12   |
| H2-O30-Co24    | 56 | 0 | 4  | 7   | 11  | H14-B2-O17-Co6 | 39 | 0 | 4   | 37   | 41   |
| H2-B1-O9-Co8   | 20 | 0 | 0  | 2   | 2   | H14-B2-O17-Co8 | 41 | 0 | 30  | 198  | 228  |
| H2-B1-O10-Co8  | 21 | 0 | 1  | 50  | 51  | H14-B3-O16-Co5 | 38 | 0 | 5   | 24   | 29   |
| H2-B1-O11-Co7  | 21 | 0 | 12 | 106 | 118 | H14-B3-O16-Co8 | 41 | 0 | 18  | 53   | 71   |
| H2-B1-O11-Co8  | 22 | 0 | 5  | 180 | 185 | H14-B4-O15-Co8 | 41 | 0 | 32  | 26   | 58   |
| H2-B1-O12-Co7  | 22 | 0 | 3  | 158 | 161 | H14-B5-O11-Co8 | 38 | 0 | 18  | 6    | 24   |
| H2-B2-O8-Co8   | 20 | 0 | 1  | 7   | 8   | H14-B5-O12-Co8 | 39 | 0 | 89  | 97   | 186  |
| H2-B2-O9-Co8   | 21 | 0 | 2  | 26  | 28  | H14-B5-O14-Co8 | 41 | 0 | 0   | 10   | 10   |
| H2-B2-O10-Co8  | 22 | 0 | 16 | 280 | 296 | H14-B6-O10-Co8 | 38 | 0 | 5   | 13   | 18   |
| H2-B2-O12-Co6  | 22 | 0 | 2  | 23  | 25  | H14-B6-O11-Co8 | 39 | 0 | 10  | 19   | 29   |
| H2-B2-O20-Co16 | 40 | 0 | 0  | 77  | 77  | H14-B8-O9-Co8  | 39 | 0 | 10  | 11   | 21   |
| H2-B2-O22-Co14 | 40 | 0 | 0  | 72  | 72  | H15-B1-O16-Co7 | 39 | 0 | 17  | 212  | 229  |
| H2-B3-O9-Co8   | 22 | 0 | 15 | 118 | 133 | H16-O8         | 24 | 0 | 14  | 3916 | 3930 |
| H2-B4-O7-Co8   | 21 | 0 | 21 | 56  | 77  | H16-O16-Co8    | 40 | 0 | 300 | 654  | 954  |
| H2-B4-         | 22 | 0 | 4  | 36  | 40  | H16-O32-Co16   | 64 | 0 | 3   | 21   | 24   |

|                |     |   |     |     |     |                  |     |   |     |     |      |  |
|----------------|-----|---|-----|-----|-----|------------------|-----|---|-----|-----|------|--|
| O8-Co8         |     |   |     |     |     |                  |     |   |     |     |      |  |
| H2-B4-O11-Co4  | 21  | 0 | 3   | 52  | 55  | H16-B1-O15-Co8   | 40  | 0 | 328 | 822 | 1150 |  |
| H3-O1-Co17     | 21  | 0 | 192 | 0   | 192 | H16-B2-O14-Co8   | 40  | 0 | 201 | 302 | 503  |  |
| H3-O2-Co28     | 33  | 0 | 0   | 54  | 54  | H16-B2-O24-Co8   | 50  | 0 | 4   | 28  | 32   |  |
| H3-O2-Co29     | 34  | 0 | 0   | 30  | 30  | H16-B2-O32-Co14  | 64  | 0 | 1   | 157 | 158  |  |
| H3-O3-Co27     | 33  | 0 | 44  | 0   | 44  | H16-B3-O13-Co8   | 40  | 0 | 24  | 56  | 80   |  |
| H3-O5-Co27     | 35  | 0 | 169 | 0   | 169 | H16-B4-O44-Co32  | 96  | 0 | 0   | 15  | 15   |  |
| H3-O6-Co3      | 12  | 0 | 4   | 1   | 5   | H18-O38-Co16     | 72  | 0 | 1   | 6   | 7    |  |
| H3-O14-Co14    | 31  | 0 | 11  | 0   | 11  | H20-O30-Co16     | 66  | 0 | 0   | 11  | 11   |  |
| H3-O21-Co14    | 38  | 0 | 2   | 0   | 2   | H20-O34-Co16     | 70  | 0 | 15  | 31  | 46   |  |
| H3-O21-Co15    | 39  | 0 | 17  | 0   | 17  | H24-O32-Co16     | 72  | 0 | 8   | 0   | 8    |  |
| H3-O21-Co16    | 40  | 0 | 5   | 18  | 23  | H24-O34-Co16     | 74  | 0 | 0   | 13  | 13   |  |
| H3-O96-Co63    | 162 | 0 | 0   | 1   | 1   | H24-B4-O40-Co32  | 100 | 0 | 7   | 13  | 20   |  |
| H3-B1-O21-Co15 | 40  | 0 | 5   | 49  | 54  | H24-B8-O36-Co32  | 100 | 0 | 1   | 10  | 11   |  |
| H4-O4-Co2      | 10  | 0 | 0   | 4   | 4   | H24-B24-O20-Co32 | 100 | 0 | 9   | 18  | 27   |  |
| H4-O6-Co28     | 38  | 0 | 173 | 0   | 173 | H28-O32-Co16     | 76  | 0 | 19  | 7   | 26   |  |
| H4-O8-Co4      | 16  | 0 | 111 | 93  | 204 | H28-O34-Co16     | 78  | 0 | 0   | 5   | 5    |  |
| H4-O12-Co8     | 24  | 0 | 34  | 303 | 337 | H28-O38-Co16     | 82  | 0 | 1   | 3   | 4    |  |
| H4-O18-Co9     | 31  | 0 | 35  | 0   | 35  | H28-B2-O32-Co14  | 76  | 0 | 1   | 19  | 20   |  |
| H4-O20-Co15    | 39  | 0 | 3   | 0   | 3   | H28-B2-O38-Co14  | 82  | 0 | 15  | 7   | 22   |  |
| H4-O20-Co16    | 40  | 0 | 23  | 9   | 32  | H28-B4-O38-Co12  | 82  | 0 | 20  | 30  | 50   |  |
| H4-O22-Co16    | 42  | 0 | 0   | 1   | 1   | H28-B4-O56-Co32  | 120 | 0 | 12  | 37  | 49   |  |

|                |     |   |    |     |     |                  |     |     |    |     |     |
|----------------|-----|---|----|-----|-----|------------------|-----|-----|----|-----|-----|
| H4-O23-Co14    | 41  | 0 | 1  | 0   | 1   | H28-B4-O60-Co28  | 120 | 0   | 11 | 0   | 11  |
| H4-O23-Co15    | 42  | 0 | 6  | 0   | 6   | H28-B6-O32-Co16  | 82  | 0   | 1  | 32  | 33  |
| H4-O23-Co16    | 43  | 0 | 3  | 4   | 7   | H28-B8-O30-Co16  | 82  | 0   | 26 | 6   | 32  |
| H4-O24-Co16    | 44  | 0 | 0  | 6   | 6   | H28-B8-O52-Co32  | 120 | 0   | 1  | 10  | 11  |
| H4-O30-Co22    | 56  | 0 | 7  | 0   | 7   | H28-B12-O48-Co32 | 120 | 0   | 6  | 14  | 20  |
| H4-O32-Co20    | 56  | 0 | 0  | 1   | 1   | H28-B16-O44-Co32 | 120 | 0   | 4  | 28  | 32  |
| H4-O128-Co84   | 216 | 0 | 0  | 2   | 2   | H30-O15          | 45  | 124 | 4  | 94  | 222 |
| H4-B1-O11-Co8  | 24  | 0 | 9  | 128 | 137 | H32-O30-Co16     | 78  | 0   | 43 | 0   | 43  |
| H4-B1-O12-Co7  | 24  | 0 | 3  | 58  | 61  | H32-O32-Co14     | 78  | 0   | 31 | 0   | 31  |
| H4-B2-O4-Co28  | 38  | 0 | 5  | 0   | 5   | H32-O32-Co16     | 80  | 0   | 26 | 0   | 26  |
| H4-B2-O10-Co8  | 24  | 0 | 7  | 38  | 45  | H36-B16-O60-Co32 | 144 | 0   | 4  | 18  | 22  |
| H4-B2-O16-Co9  | 31  | 0 | 11 | 49  | 60  | H40-B4-O56-Co32  | 132 | 0   | 2  | 21  | 23  |
| H4-B2-O18-Co16 | 40  | 0 | 0  | 21  | 21  | H40-B4-O60-Co28  | 132 | 0   | 3  | 46  | 49  |
| H4-B3-O9-Co8   | 24  | 0 | 8  | 48  | 56  | H40-B8-O60-Co24  | 132 | 0   | 0  | 26  | 26  |
| H4-B3-O15-Co9  | 31  | 0 | 4  | 10  | 14  | H40-B16-O44-Co32 | 132 | 0   | 12 | 8   | 20  |
| H4-B3-O17-Co16 | 40  | 0 | 9  | 67  | 76  | H48-B4-O64-Co32  | 148 | 0   | 0  | 104 | 104 |
| H4-B4-O8-Co8   | 24  | 0 | 3  | 18  | 21  | H48-B4-O68-Co28  | 148 | 0   | 0  | 6   | 6   |
| H4-B4-O12-Co4  | 24  | 0 | 2  | 18  | 20  | H48-B8-O60-Co32  | 148 | 0   | 2  | 6   | 8   |
| H4-B4-O16-Co16 | 40  | 0 | 1  | 27  | 28  | H48-B8-O68-Co24  | 148 | 0   | 50 | 75  | 125 |
| H4-B4-O44-     | 80  | 0 | 6  | 128 | 134 | H48-B12-O56-Co32 | 148 | 0   | 2  | 24  | 26  |

|                 |     |   |     |     |     |                  |     |     |     |      |      |  |
|-----------------|-----|---|-----|-----|-----|------------------|-----|-----|-----|------|------|--|
| Co28            |     |   |     |     |     |                  |     |     |     |      |      |  |
| H4-B11-O13-Co16 | 44  | 0 | 6   | 8   | 14  | H48-B16-O52-Co32 | 148 | 0   | 7   | 26   | 33   |  |
| H4-B40-Co16     | 60  | 0 | 4   | 0   | 4   | H48-B20-O48-Co32 | 148 | 0   | 1   | 8    | 9    |  |
| H4-B44-O80-Co12 | 140 | 0 | 0   | 66  | 66  | H52-O44-Co12     | 108 | 0   | 18  | 0    | 18   |  |
| H5-Co22         | 27  | 0 | 144 | 0   | 144 | H52-O45-Co12     | 109 | 0   | 23  | 0    | 23   |  |
| H5-O2-Co26      | 33  | 0 | 164 | 72  | 236 | H52-O46-Co12     | 110 | 0   | 13  | 0    | 13   |  |
| H5-O2-Co27      | 34  | 0 | 0   | 36  | 36  | H52-B9-O36-Co12  | 109 | 0   | 25  | 1    | 26   |  |
| H5-O3-Co25      | 33  | 0 | 466 | 0   | 466 | H52-B11-O35-Co12 | 110 | 0   | 8   | 0    | 8    |  |
| H5-O4-Co24      | 33  | 0 | 158 | 0   | 158 | H56-B4-O60-Co32  | 152 | 0   | 2   | 29   | 31   |  |
| H5-O15-Co9      | 29  | 0 | 9   | 0   | 9   | H56-B4-O64-Co28  | 152 | 0   | 14  | 116  | 130  |  |
| H5-O19-Co16     | 40  | 0 | 7   | 13  | 20  | H56-B4-O64-Co32  | 156 | 0   | 9   | 77   | 86   |  |
| H5-O21-Co15     | 41  | 0 | 9   | 0   | 9   | H56-B8-O68-Co24  | 156 | 0   | 29  | 156  | 185  |  |
| H5-O21-Co16     | 42  | 0 | 5   | 10  | 15  | H56-B24-O40-Co32 | 152 | 0   | 28  | 8    | 36   |  |
| H5-B1-O2-Co25   | 33  | 0 | 11  | 0   | 11  | H64-B4-O60-Co28  | 156 | 0   | 7   | 0    | 7    |  |
| H5-B1-O16-Co8   | 30  | 0 | 0   | 114 | 114 | H104-O32-Co4     | 140 | 0   | 18  | 68   | 86   |  |
| H5-B2-O3-Co23   | 33  | 0 | 5   | 0   | 5   | total            | --  | 688 | 884 | 3259 | 4213 |  |
|                 |     |   |     |     |     |                  |     | 7   | 9   | 4    |      |  |

**Table S3.** Benchmark of G-NN against DFT calculations for key structures of the Co-B-O-H composite system.

| Chem. formula |    |    |    | N <sub>atom</sub> | E <sub>DFT</sub> (eV) | E <sub>NN</sub> (eV) | E <sub>diff</sub> (meV)/atom |
|---------------|----|----|----|-------------------|-----------------------|----------------------|------------------------------|
| Co            | B  | O  | H  |                   |                       |                      |                              |
| Bulk          |    |    |    |                   |                       |                      |                              |
| 8             | 2  | 16 | 2  | 28                | -175.232              | -175.115             | 4.155                        |
| 8             | 2  | 16 | 2  | 28                | -174.673              | -174.437             | 8.436                        |
| 8             | 2  | 16 | 2  | 28                | -174.937              | -175.019             | -2.929                       |
| 8             | 0  | 16 | 8  | 32                | -182.904              | -182.921             | -0.527                       |
| 16            | 5  | 32 | 1  | 54                | -344.913              | -345.746             | -15.422                      |
| 24            | 8  | 48 | 0  | 80                | -515.778              | -514.798             | 12.248                       |
| 16            | 1  | 32 | 13 | 62                | -360.308              | -359.923             | 6.224                        |
| Slab          |    |    |    |                   |                       |                      |                              |
| 32            | 64 | 12 | 16 | 124               | -751.307              | -751.071             | 1.905                        |
| 32            | 64 | 12 | 15 | 123               | -746.36               | -746.311             | 0.393                        |
| 32            | 64 | 12 | 14 | 122               | -741.155              | -740.953             | 1.655                        |
| 32            | 64 | 12 | 13 | 121               | -734.482              | -734.967             | -4.008                       |
| 32            | 64 | 13 | 14 | 123               | -744.524              | -744.427             | 0.791                        |

**Table S4.** Asummary of overpotential, tafel, BET,  $C_{dl}$  values of  $Co_xFe_y$ -B sample.

| Catalst                            | Overpvntial (mV) | Tafel (mV/dec) | BET (m <sup>2</sup> /g) | $C_{dl}$ (mF/cm <sup>2</sup> ) |
|------------------------------------|------------------|----------------|-------------------------|--------------------------------|
| Co-B                               | 379              | 78.08          | 233                     | 4.12                           |
| Co <sub>9</sub> Fe-B               | 331              | 51.21          | 261                     | 12.70                          |
| Co <sub>4</sub> Fe-B               | 279              | 43.65          | 347                     | 24.20                          |
| Co <sub>7</sub> Fe <sub>3</sub> -B | 309              | 55.05          | 266                     | 14.93                          |
| CoFe-B                             | 335              | 54.97          | 259                     | 9.45                           |
| Co-p                               | 394              | 83.93          | 229                     | 3.64                           |
| Co <sub>4</sub> Fe                 | 297              | 46.46          | 304                     | 19.81                          |

**Table S5.** Transmission EXAFS fitting parameters for Co<sub>4</sub>Fe-B sample.

| Shell    | CN      | R(Å)      | $\sigma^2(\text{Å}^2)$ | $\Delta E_0(\text{eV})$ | R factor |
|----------|---------|-----------|------------------------|-------------------------|----------|
| Co-O     | 3.0±0.6 | 1.95±0.03 | 0.0030                 | 0.1±5.3                 | 0.0118   |
| Co-O     | 2.6±0.6 | 2.11±0.03 |                        |                         |          |
| Co-Co/Fe | 8.7±0.7 | 2.95±0.01 | 0.0102                 | -1.9±1.4                |          |
| Co-Co/Fe | 9.3±1.1 | 3.48±0.01 |                        |                         |          |
| Fe-O     | 5.5±0.9 | 1.95±0.02 | 0.0127                 | -5.4±3.6                | 0.0071   |
| Fe-O     | 0.5±0.1 | 2.03±0.02 |                        |                         |          |
| Fe-Fe/Co | 4.9±0.3 | 2.98±0.01 | 0.0101                 | -2.6±1.6                |          |
| Fe-Fe/Co | 5.0±0.5 | 3.48±0.01 |                        |                         |          |

## Reference

- 1 Z. Wu, X. F. Lu, S. Zang and X. W. (David) Lou, *Adv. Funct. Mater.*, 2020, **30**, 1910274.
- 2 I. S. Filimonenkov, G. A. Tsirlina and E. R. Savinova, *Electrochimica Acta*, 2019, **319**, 227–236.
- 3 Y. Pan, H. Ren, R. Chen, Y. Wu and D. Chu, *Chem. Eng. J.*, 2020, **398**, 125660.
- 4 X. Wang, L. Yu, B. Y. Guan, S. Song and X. W. (David) Lou, *Adv. Mater.*, 2018, **30**, 1801211.
- 5 J. Li, Y. Kang, D. Liu, Z. Lei and P. Liu, *ACS Appl. Mater. Interfaces*, 2020, **12**, 5717–5729.
- 6 R.-Q. Li, P. Hu, M. Miao, Y. Li, X.-F. Jiang, Q. Wu, Z. Meng, Z. Hu, Y. Bando and X.-B. Wang, *J. Mater. Chem. A*, 2018, **6**, 24767–24772.
- 7 R. Jin, J. Huang, G. Chen, W. Chen, B. Ouyang, D. Chen, E. Kan, H. Zhu, C. Li, D. Yang and K. (Ken) Ostrikov, *Chem. Eng. J.*, 2020, **402**, 126257.
- 8 K. Lan, J. Li, Y. Zhu, L. Gong, F. Li, P. Jiang, F. Niu and R. Li, *J. Colloid Interface Sci.*, 2019, **539**, 646–653.
- 9 Y. Tong, Q. Sun, P. Chen, L. Chen, Z. Fei and P. J. Dyson, *ChemSusChem*, 2020, **13**, 5112–5118.
- 10 Y. Chen, S. Ji, Y. Wang, J. Dong, W. Chen, Z. Li, R. Shen, L. Zheng, Z. Zhuang, D. Wang and Y. Li, *Angew. Chem. Int. Ed.*, 2017, **56**, 6937–6941.
- 11 X. Han, C. Yu, S. Zhou, C. Zhao, H. Huang, J. Yang, Z. Liu, J. Zhao and J. Qiu, *Adv. Energy Mater.*, 2017, **7**, 1602148.
- 12 B. T. Jebaslinhepzybai, T. Partheeban, D. S. Gavali, R. Thapa and M. Sasidharan, *Int. J. Hydrog. Energy*, 2021, **46**, 21924–21938.
- 13 P. Guo, J. Wu, X.-B. Li, J. Luo, W.-M. Lau, H. Liu, X.-L. Sun and L.-M. Liu, *Nano Energy*, 2018, **47**, 96–104.
- 14 L. Wu, D. Shi, S. Yan, W. Qiao, W. Zhong and Y. Du, *Int. J. Hydrog. Energy*, 2021, **46**, 2086–2094.
- 15 J. Cheng, X. Yue, C. Chen, X. Shen, S. Zeng, Z. Ji, A. Yuan and G. Zhu, *SSRN Electron. J.*, DOI:10.2139/ssrn.3902687.
- 16 G. A. Gebreslase, M. V. Martínez-Huerta, D. Sebastián and M. J. Lázaro, *J. Colloid Interface Sci.*, 2022, **625**, 70–82.
- 17 F. Diao, M. Rykær Kraglund, H. Cao, X. Yan, P. Liu, C. Engelbrekt and X. Xiao, *J. Energy Chem.*, 2023, **78**, 476–486.
- 18 J.-H. Oh, Y. H. Lee, M. Kim, S.-H. Hong, T.-H. Kim and S. Choi, *J. Environ. Chem. Eng.*, 2023, **11**, 109578.
- 19 M. A. Suliman, M. H. Suliman, A. Adam, C. Basheer, Z. H. Yamani and M. Qamar, *Mater. Lett.*, 2020, **268**, 127593.
- 20 R. K. Tripathy, A. K. Samantara and J. N. Behera, *Dalton Trans.*, 2022, **51**, 2782–2788.
- 21 X. Zhao, B. Wen, Q. Dong, P. Wang and X. Lyu, *Int. J. Hydrog. Energy*, 2025, **105**, 556–564.
